# Supplementary material for: Urinary neopterin of wild chimpanzees indicates that cell-mediated immune activity varies by age, sex, and female reproductive status
Source: PubMed Central journal article supplement (PMC8085242; doi:10.1038/s41598-021-88401-6), 2021-04-29
Supplement: 41598_2021_88401_MOESM1_ESM.pdf [file 41598_2021_88401_MOESM1_ESM.pdf]

**Urinary neopterin of wild chimpanzees indicates that cell-mediated immune activity varies by age, sex, and female reproductive status**

Jacob D. Negrey<sup>1,2\*</sup>, Verena Behringer<sup>3</sup>, Kevin E. Langergraber<sup>4,5</sup>, and Tobias Deschner<sup>6\*\*</sup>

<sup>1</sup>Department of Anthropology, Boston University, Boston, MA, 02215, USA

<sup>2</sup>Department of Pathobiological Sciences, University of Wisconsin-Madison, Madison, WI, 53706, USA

<sup>3</sup>Endocrinology Laboratory, German Primate Center, Leibniz Institute for Primate Research, Göttingen, 37077, DE

<sup>4</sup>School of Human Evolution and Social Change, Arizona State University, Tempe, AZ, 85287, USA

<sup>5</sup>Institute of Human Origins, Arizona State University, Tempe, AZ, 85287, USA

<sup>6</sup>Interim Group Primatology, Max Planck Institute for Evolutionary Anthropology, Leipzig, 04103, DE

**\*Corresponding author:** negrey@wisc.edu

**\*\*Corresponding author:** deschner@eva.mpg.de

**Supplementary Table S1.** Summary of urine samples by chimpanzee age and sex. “Prime” and “past-prime” refer to chimpanzees aged <35 years and ≥35 years, respectively. Values in parentheses indicate the mean and standard deviation of urine samples per individual chimpanzee.

| Sex     | Prime<br>(N = 21 females, 26 males) | Past-Prime<br>(N = 15 females, 8 males) | Overall<br>(N = 36 females, 34 males) |
|---------|-------------------------------------|-----------------------------------------|---------------------------------------|
| Females | 100 (4.76 ± 3.60)                   | 123 (8.20 ± 6.35)                       | 223 (6.19 ± 5.15)                     |
| Males   | 205 (7.89 ± 3.94)                   | 74 (9.25 ± 4.71)                        | 279 (8.21 ± 4.10)                     |
| Total   | 305 (6.49 ± 4.07)                   | 197 (8.57 ± 5.74)                       | 502 (7.17 ± 4.75)                     |

**Supplementary Table S2.** Results of a generalized additive model predicting urinary neopterin levels in male and female chimpanzees. edf = estimated degrees of freedom. Bold font indicates statistical significance.

| Parametric Coefficients    | $\beta$ | SE               | p                |
|----------------------------|---------|------------------|------------------|
| Intercept                  | -1.386  | 0.011            | <b>&lt;0.001</b> |
| Sex                        | 0.059   | 0.022            | <b>0.009</b>     |
| Smooth Terms               | edf     | p                |                  |
| Age x Sex                  | 1.000   | 0.893            |                  |
| Age                        | 1.000   | <b>0.013</b>     |                  |
| Time of Day                | 1.000   | <b>&lt;0.001</b> |                  |
| Date                       | 7.411   | <b>&lt;0.001</b> |                  |
| Subject ID (Random Effect) | 29.725  | <b>&lt;0.001</b> |                  |

**Supplementary Table S3.** Results of a post-hoc linear mixed model examining urinary neopterin in “prime” individuals aged <35 years (N = 47 individuals, 305 urine samples). Bold font indicates statistical significance.

| Predictor                   | $\beta$       | SE           | DF             | p                |
|-----------------------------|---------------|--------------|----------------|------------------|
| Intercept                   | -2.240        | 0.022        |                |                  |
| Age (Years)                 | 0.007         | 0.012        | 39.804         | 0.535            |
| <b>Sex (Male)</b>           | <b>0.075</b>  | <b>0.026</b> | <b>47.218</b>  | <b>0.006</b>     |
| <b>Time of Day</b>          | <b>-0.032</b> | <b>0.009</b> | <b>292.081</b> | <b>&lt;0.001</b> |
| Sine (Julian Date)          | 0.004         | 0.013        | 290.132        | 0.774            |
| <b>Cosine (Julian Date)</b> | <b>0.095</b>  | <b>0.017</b> | <b>45.686</b>  | <b>&lt;0.001</b> |

**Supplementary Table S4.** Results of a post-hoc linear mixed model examining urinary neopterin in “past-prime” individuals aged  $\geq 35$  years (N = 23 individuals, 197 urine samples). Bold font indicates statistical significance.

| Predictor                   | $\beta$       | SE           | DF             | p            |
|-----------------------------|---------------|--------------|----------------|--------------|
| Intercept                   | -0.206        | 0.004        |                |              |
| Age (Years)                 | 0.007         | 0.004        | 16.660         | 0.082        |
| Sex (Male)                  | 0.013         | 0.007        | 21.650         | 0.070        |
| <b>Time of Day</b>          | <b>-0.006</b> | <b>0.002</b> | <b>190.600</b> | <b>0.006</b> |
| Sine (Julian Date)          | -0.001        | 0.003        | 189.400        | 0.781        |
| <b>Cosine (Julian Date)</b> | <b>0.015</b>  | <b>0.004</b> | <b>19.970</b>  | <b>0.002</b> |

**Supplementary Table S5.** Results for six variants of a linear mixed model predicting neopterin by female reproductive status. “Reproductive status” is a categorical variable with six levels, and each level acted as the reference level in one of the model variants. Bold font indicates statistical significance.

| Reference Level | Predictor                                      | $\beta$       | SE           | DF             | p                |
|-----------------|------------------------------------------------|---------------|--------------|----------------|------------------|
| Lactating       | Intercept                                      | -7.241        | 0.031        |                |                  |
|                 | Reproductive Status - Cycling (0)              | -0.074        | 0.061        | 76.848         | 0.231            |
|                 | Reproductive Status - Cycling (1)              | 0.044         | 0.054        | 82.979         | 0.421            |
|                 | <b>Reproductive Status - Cycling (2)</b>       | <b>0.203</b>  | <b>0.060</b> | <b>137.883</b> | <b>0.001</b>     |
|                 | <b>Reproductive Status - Pregnant</b>          | <b>0.153</b>  | <b>0.065</b> | <b>97.271</b>  | <b>0.022</b>     |
|                 | <b>Reproductive Status - Post-Reproductive</b> | <b>0.178</b>  | <b>0.053</b> | <b>13.697</b>  | <b>0.005</b>     |
| Cycling (0)     | <b>Time of Day</b>                             | <b>-0.082</b> | <b>0.014</b> | <b>210.264</b> | <b>&lt;0.001</b> |
|                 | Sine (Julian Date)                             | -0.042        | 0.025        | 196.857        | 0.094            |
|                 | <b>Cosine (Julian Date)</b>                    | <b>0.150</b>  | <b>0.035</b> | <b>41.875</b>  | <b>&lt;0.001</b> |
|                 | Intercept                                      | -7.315        | 0.053        |                |                  |
| Cycling (1)     | Reproductive Status - Cycling (1)              | 0.118         | 0.070        | 209.819        | 0.094            |
|                 | <b>Reproductive Status - Cycling (2)</b>       | <b>0.276</b>  | <b>0.074</b> | <b>193.350</b> | <b>&lt;0.001</b> |
|                 | <b>Reproductive Status - Pregnant</b>          | <b>0.227</b>  | <b>0.079</b> | <b>124.583</b> | <b>0.005</b>     |
|                 | <b>Reproductive Status - Post-Reproductive</b> | <b>0.252</b>  | <b>0.070</b> | <b>30.657</b>  | <b>0.001</b>     |
|                 | Reproductive Status - Lactating                | 0.074         | 0.061        | 76.848         | 0.231            |
|                 | <b>Time of Day</b>                             | <b>-0.082</b> | <b>0.014</b> | <b>210.264</b> | <b>&lt;0.001</b> |
| Cycling (1)     | Sine (Julian Date)                             | -0.042        | 0.025        | 196.857        | 0.094            |
|                 | <b>Cosine (Julian Date)</b>                    | <b>0.150</b>  | <b>0.035</b> | <b>41.875</b>  | <b>&lt;0.001</b> |
|                 | Intercept                                      | -7.197        | 0.047        |                |                  |

|                   |                                                |               |              |                |                  |
|-------------------|------------------------------------------------|---------------|--------------|----------------|------------------|
|                   | <b>Reproductive Status - Cycling (2)</b>       | <b>0.159</b>  | <b>0.062</b> | <b>209.359</b> | <b>0.012</b>     |
|                   | Reproductive Status - Pregnant                 | 0.109         | 0.071        | 120.438        | 0.129            |
|                   | <b>Reproductive Status - Post-Reproductive</b> | <b>0.134</b>  | <b>0.062</b> | <b>24.283</b>  | <b>0.040</b>     |
|                   | Reproductive Status - Lactating                | -0.044        | 0.054        | 82.979         | 0.421            |
|                   | Reproductive Status - Cycling (0)              | -0.118        | 0.070        | 209.819        | 0.094            |
|                   | <b>Time of Day</b>                             | <b>-0.082</b> | <b>0.014</b> | <b>210.264</b> | <b>&lt;0.001</b> |
|                   | Sine (Julian Date)                             | -0.042        | 0.025        | 196.857        | 0.094            |
|                   | <b>Cosine (Julian Date)</b>                    | <b>0.150</b>  | <b>0.035</b> | <b>41.875</b>  | <b>&lt;0.001</b> |
| Cycling (2)       | Intercept                                      | -7.039        | 0.054        |                |                  |
|                   | Reproductive Status - Pregnant                 | -0.050        | 0.076        | 116.122        | 0.514            |
|                   | Reproductive Status - Post-Reproductive        | -0.024        | 0.068        | 37.035         | 0.722            |
|                   | <b>Reproductive Status - Lactating</b>         | <b>-0.203</b> | <b>0.060</b> | <b>137.883</b> | <b>0.001</b>     |
|                   | <b>Reproductive Status - Cycling (0)</b>       | <b>-0.276</b> | <b>0.074</b> | <b>193.350</b> | <b>&lt;0.001</b> |
|                   | <b>Reproductive Status - Cycling (1)</b>       | <b>-0.159</b> | <b>0.062</b> | <b>209.359</b> | <b>0.012</b>     |
|                   | <b>Time of Day</b>                             | <b>-0.082</b> | <b>0.014</b> | <b>210.264</b> | <b>&lt;0.001</b> |
|                   | Sine (Julian Date)                             | -0.042        | 0.025        | 196.857        | 0.094            |
|                   | <b>Cosine (Julian Date)</b>                    | <b>0.150</b>  | <b>0.035</b> | <b>41.875</b>  | <b>&lt;0.001</b> |
| Pregnant          | Intercept                                      | -7.088        | 0.061        |                |                  |
|                   | Reproductive Status - Post-Reproductive        | 0.026         | 0.073        | 33.073         | 0.729            |
|                   | <b>Reproductive Status - Lactating</b>         | <b>-0.153</b> | <b>0.065</b> | <b>97.271</b>  | <b>0.022</b>     |
|                   | <b>Reproductive Status - Cycling (0)</b>       | <b>-0.227</b> | <b>0.079</b> | <b>124.583</b> | <b>0.005</b>     |
|                   | Reproductive Status - Cycling (1)              | -0.109        | 0.071        | 120.438        | 0.129            |
|                   | Reproductive Status - Cycling (2)              | 0.050         | 0.076        | 116.122        | 0.514            |
|                   | <b>Time of Day</b>                             | <b>-0.082</b> | <b>0.014</b> | <b>210.264</b> | <b>&lt;0.001</b> |
|                   | Sine (Julian Date)                             | -0.042        | 0.025        | 196.857        | 0.094            |
|                   | <b>Cosine (Julian Date)</b>                    | <b>0.150</b>  | <b>0.035</b> | <b>41.875</b>  | <b>&lt;0.001</b> |
| Post-Reproductive | Intercept                                      | -7.063        | 0.046        |                |                  |
|                   | <b>Reproductive Status - Lactating</b>         | <b>-0.178</b> | <b>0.053</b> | <b>13.697</b>  | <b>0.005</b>     |
|                   | <b>Reproductive Status - Cycling (0)</b>       | <b>-0.252</b> | <b>0.070</b> | <b>30.657</b>  | <b>0.001</b>     |
|                   | <b>Reproductive Status - Cycling (1)</b>       | <b>-0.134</b> | <b>0.062</b> | <b>24.283</b>  | <b>0.040</b>     |
|                   | Reproductive Status - Cycling (2)              | 0.024         | 0.068        | 37.035         | 0.722            |
|                   | Reproductive Status - Pregnant                 | -0.026        | 0.073        | 33.073         | 0.729            |
|                   | <b>Time of Day</b>                             | <b>-0.082</b> | <b>0.014</b> | <b>210.264</b> | <b>&lt;0.001</b> |
|                   | Sine (Julian Date)                             | -0.042        | 0.025        | 196.857        | 0.094            |
|                   | <b>Cosine (Julian Date)</b>                    | <b>0.150</b>  | <b>0.035</b> | <b>41.875</b>  | <b>&lt;0.001</b> |
